# Supplementary material for: Electroreduction of N2 to NH3 catalyzed by a Mn/Re(111) single-atom alloy catalyst with high activity and selectivity: a new insight from a first-principles study
Source: Royal Society of Chemistry journal article supplement (doi:10.1039/d2cy00435f), 2022-01-01
Supplement: d2cy00435f1.pdf [file d2cy00435f1.pdf]

## Electronic Supplementary Information

# Electroreduction of N<sub>2</sub> to NH<sub>3</sub> Catalyzed by Mn/Re(111) Single-Atom Alloy Catalyst with High Activity and Selectivity: A New Insight from the First-Principal Study

Ning Cao,<sup>a,b</sup> Nan Zhang,<sup>a,b</sup> Yong-Qing Qiu,<sup>c</sup> and Chun-Guang Liu<sup>\*a</sup>

<sup>a</sup> *Department of Chemistry, Faculty of Science, Beihua University, Jilin City,  
132013, P. R. China*

<sup>b</sup> *College of Chemical Engineering, Northeast Electric Power University, Jilin  
City, 132012, P. R. China*

<sup>c</sup> *Institute of Functional Material Chemistry, Faculty of Chemistry, Northeast  
Normal University, Changchun 130024, P. R. China;*

*\*E-mail: [liucg407@163.com](mailto:liucg407@163.com)*

**Table S1.** Calculated binding energies ( $E_b$ ) and cohesive energies ( $E_c$ ) for all SAA catalysts. The difference between binding energies and cohesive energies ( $E_b - E_c$ ) for all SAA catalysts.

| <b>Metal</b> | <b><math>E_b</math> (eV)</b> | <b><math>E_c</math> (eV)</b> | <b><math>E_b - E_c</math> (eV)</b> |
|--------------|------------------------------|------------------------------|------------------------------------|
| Cr           | -7.42                        | -5.02                        | -2.39                              |
| Mn           | -5.80                        | -3.78                        | -2.02                              |
| Fe           | -7.28                        | -4.88                        | -2.39                              |
| Co           | -7.26                        | -5.11                        | -2.15                              |
| Ni           | -7.45                        | -5.10                        | -2.35                              |
| Cu           | -5.68                        | -3.50                        | -2.18                              |
| Mo           | -8.74                        | -5.87                        | -2.87                              |
| Tc           | -9.47                        | -6.95                        | -2.52                              |
| Ru           | -10.45                       | -7.91                        | -2.54                              |
| Rh           | -8.85                        | -6.04                        | -2.81                              |
| Pd           | -6.52                        | -3.76                        | -2.76                              |
| Ag           | -4.57                        | -2.51                        | -2.06                              |
| W            | -11.22                       | -8.40                        | -2.82                              |
| Os           | -10.73                       | -8.19                        | -2.54                              |
| Ir           | -10.30                       | -7.32                        | -2.98                              |
| Pt           | -8.87                        | -5.57                        | -3.31                              |
| Au           | -5.85                        | -3.00                        | -2.85                              |

**Table S2.** Bader charge transfer from the support to the TM atoms when different TM atoms are anchored to the defective Re(111) surface. A negative value represents the transfer of Bader charge from the TM atom to the support and a positive value represents the transfer of Bader charge from the support to the TM atom.

| <b>Metal</b> | <b>Charge transfer (<math>e^-</math>)</b> |
|--------------|-------------------------------------------|
| Cr           | -0.62                                     |
| Mn           | -0.29                                     |
| Fe           | -0.25                                     |
| Co           | 0.04                                      |
| Ni           | 0.10                                      |
| Cu           | 0.03                                      |
| Mo           | -0.47                                     |
| Tc           | -0.06                                     |
| Ru           | 0.23                                      |
| Rh           | 0.40                                      |
| Pd           | 0.38                                      |
| Ag           | 0.19                                      |
| W            | -0.45                                     |
| Os           | 0.41                                      |
| Ir           | 0.65                                      |
| Pt           | 0.70                                      |
| Au           | 0.56                                      |

**Table S3.** Summary of adsorption energies of \*N<sub>2</sub>, adsorption free energies of \*N<sub>2</sub>, and the N-N bond lengths of \*N<sub>2</sub>.

| Metal | End-on                  |                         |                        | Side-on                 |                         |                     |
|-------|-------------------------|-------------------------|------------------------|-------------------------|-------------------------|---------------------|
|       | $E_{\text{ad}}$<br>(eV) | $G_{\text{ad}}$<br>(eV) | N-N bond length<br>(Å) | $E_{\text{ad}}$<br>(eV) | $G_{\text{ad}}$<br>(eV) | N-N bond length (Å) |
| Cr    | -0.59                   | 0.04                    | 1.130                  | -0.55                   | 0.04                    | 1.317               |
| Mn    | -0.80                   | -0.23                   | 1.130                  | -0.56                   | -0.01                   | 1.288               |
| Fe    | -0.33                   | 0.25                    | 1.133                  | 0.00                    | 0.55                    | 1.272               |
| Co    | -0.59                   | -0.01                   | 1.134                  | ×                       | ×                       | ×                   |
| Ni    | -0.25                   | 0.34                    | 1.129                  | ×                       | ×                       | ×                   |
| Cu    | 0.00                    | 0.53                    | 1.114                  | ×                       | ×                       | ×                   |
| Mo    | -0.58                   | 0.01                    | 1.128                  | -0.34                   | 0.24                    | 1.310               |
| Tc    | -0.58                   | -0.04                   | 1.130                  | -0.19                   | 0.38                    | 1.304               |
| Ru    | -0.56                   | -0.01                   | 1.131                  | 0.10                    | 0.65                    | 1.262               |
| Rh    | -0.45                   | 0.10                    | 1.129                  | -0.22                   | 0.32                    | 1.261               |
| Pd    | 0.05                    | 0.63                    | 1.122                  | ×                       | ×                       | ×                   |
| Ag    | -0.01                   | 0.50                    | 1.114                  | ×                       | ×                       | ×                   |
| W     | -0.62                   | -0.05                   | 1.130                  | -0.33                   | 0.25                    | 1.326               |
| Os    | -0.53                   | 0.03                    | 1.133                  | 0.19                    | 0.75                    | 1.290               |
| Ir    | -0.41                   | 0.18                    | 1.132                  | 0.55                    | 1.07                    | 1.237               |
| Pt    | 0.09                    | 0.63                    | 1.126                  | ×                       | ×                       | ×                   |
| Au    | -0.01                   | 0.52                    | 1.114                  | ×                       | ×                       | ×                   |

**Table S4.** Free energy changes of six PCET processes on seven highly reactive SAA catalysts (Distal mechanism).

|    | $*N_2 \rightarrow$<br>$*NNH$<br>(eV) | $*NNH \rightarrow$<br>$*NNH_2$<br>(eV) | $*NNH_2$<br>$\rightarrow *N$<br>(eV) | $*N \rightarrow$<br>$*NH$<br>(eV) | $*NH \rightarrow$<br>$*NH_2$<br>(eV) | $*NH_2 \rightarrow$<br>$*NH_3$<br>(eV) |
|----|--------------------------------------|----------------------------------------|--------------------------------------|-----------------------------------|--------------------------------------|----------------------------------------|
| Cr | 0.91                                 | -0.26                                  | -0.26                                | -0.79                             | -0.20                                | -0.45                                  |
| Mn | 0.91                                 | 0.05                                   | -0.53                                | -0.35                             | -0.18                                | -0.53                                  |
| Fe | 0.87                                 | 0.42                                   | -0.59                                | -0.14                             | -0.84                                | -0.72                                  |
| Tc | 0.85                                 | -0.07                                  | -0.65                                | -0.36                             | -0.15                                | -0.58                                  |
| Ru | 1.00                                 | 0.28                                   | -0.73                                | 0.01                              | -0.62                                | -0.85                                  |
| W  | 0.90                                 | -0.35                                  | 0.05                                 | -1.32                             | -0.23                                | -0.25                                  |
| Os | 0.86                                 | 0.21                                   | -0.88                                | 0.02                              | -0.49                                | -0.68                                  |

**Table S5.** Free energy changes of six PCET processes on seven highly reactive SAA catalysts (Alternating mechanism).

|    | $*N_2 \rightarrow$<br>$*NNH$<br>(eV) | $*NNH \rightarrow$<br>$*NHNH$<br>(eV) | $*NHNH \rightarrow$<br>$*NHNH_2$<br>(eV) | $*NHNH_2 \rightarrow$<br>$*NH_2NH_2$<br>(eV) | $*NHNH_2$<br>$\rightarrow *NH_2$<br>(eV) | $*NH_2 \rightarrow$<br>$*NH_3$<br>(eV) |
|----|--------------------------------------|---------------------------------------|------------------------------------------|----------------------------------------------|------------------------------------------|----------------------------------------|
| Cr | 0.91                                 | 0.41                                  | -0.42                                    | -0.11                                        | -1.40                                    | -0.45                                  |
| Mn | 0.91                                 | 0.50                                  | -0.09                                    | 0.03                                         | -1.46                                    | -0.53                                  |
| Fe | 0.87                                 | 0.53                                  | -0.17                                    | -0.34                                        | -1.16                                    | -0.72                                  |
| Tc | 0.85                                 | 0.57                                  | -0.34                                    | -0.17                                        | -1.29                                    | -0.58                                  |
| Ru | 1.00                                 | 0.45                                  | -0.19                                    | -0.29                                        | -1.03                                    | -0.85                                  |
| W  | 0.90                                 | 0.38                                  | -0.52                                    | -0.03                                        | -1.67                                    | -0.25                                  |
| Os | 0.86                                 | 0.49                                  | -0.24                                    | -0.23                                        | -1.17                                    | -0.68                                  |

**Table S6.** Free energy changes of the second \*NH<sub>3</sub> desorption from the catalysts.

| <b>Metal</b> | <b><math>\Delta G</math> (eV)</b> |
|--------------|-----------------------------------|
| Cr           | 0.32                              |
| Mn           | 0.15                              |
| Fe           | 0.04                              |
| Co           | 0.06                              |
| Ni           | -0.06                             |
| Cu           | -0.33                             |
| Mo           | 0.41                              |
| Tc           | 0.30                              |
| Ru           | 0.22                              |
| Rh           | 0.18                              |
| Pd           | -0.08                             |
| Ag           | -0.30                             |
| W            | 0.54                              |
| Os           | 0.23                              |
| Ir           | 0.12                              |
| Pt           | -0.10                             |
| Au           | -0.46                             |

**Table S7.** Bader charge transfer from the catalysts to the N<sub>2</sub> when they are adsorbed to the SAA catalysts.

| <b>Metal</b> | <b>Charge transfer (e<sup>-</sup>)</b> |
|--------------|----------------------------------------|
| Cr           | 0.27                                   |
| Mn           | 0.27                                   |
| Fe           | 0.28                                   |
| Co           | 0.30                                   |
| Ni           | 0.23                                   |
| Cu           | 0.01                                   |
| Mo           | 0.26                                   |
| Tc           | 0.28                                   |
| Ru           | 0.25                                   |
| Rh           | 0.20                                   |
| Pd           | 0.12                                   |
| Ag           | 0.01                                   |
| W            | 0.27                                   |
| Os           | 0.26                                   |
| Ir           | 0.23                                   |
| Pt           | 0.14                                   |
| Au           | 0.01                                   |

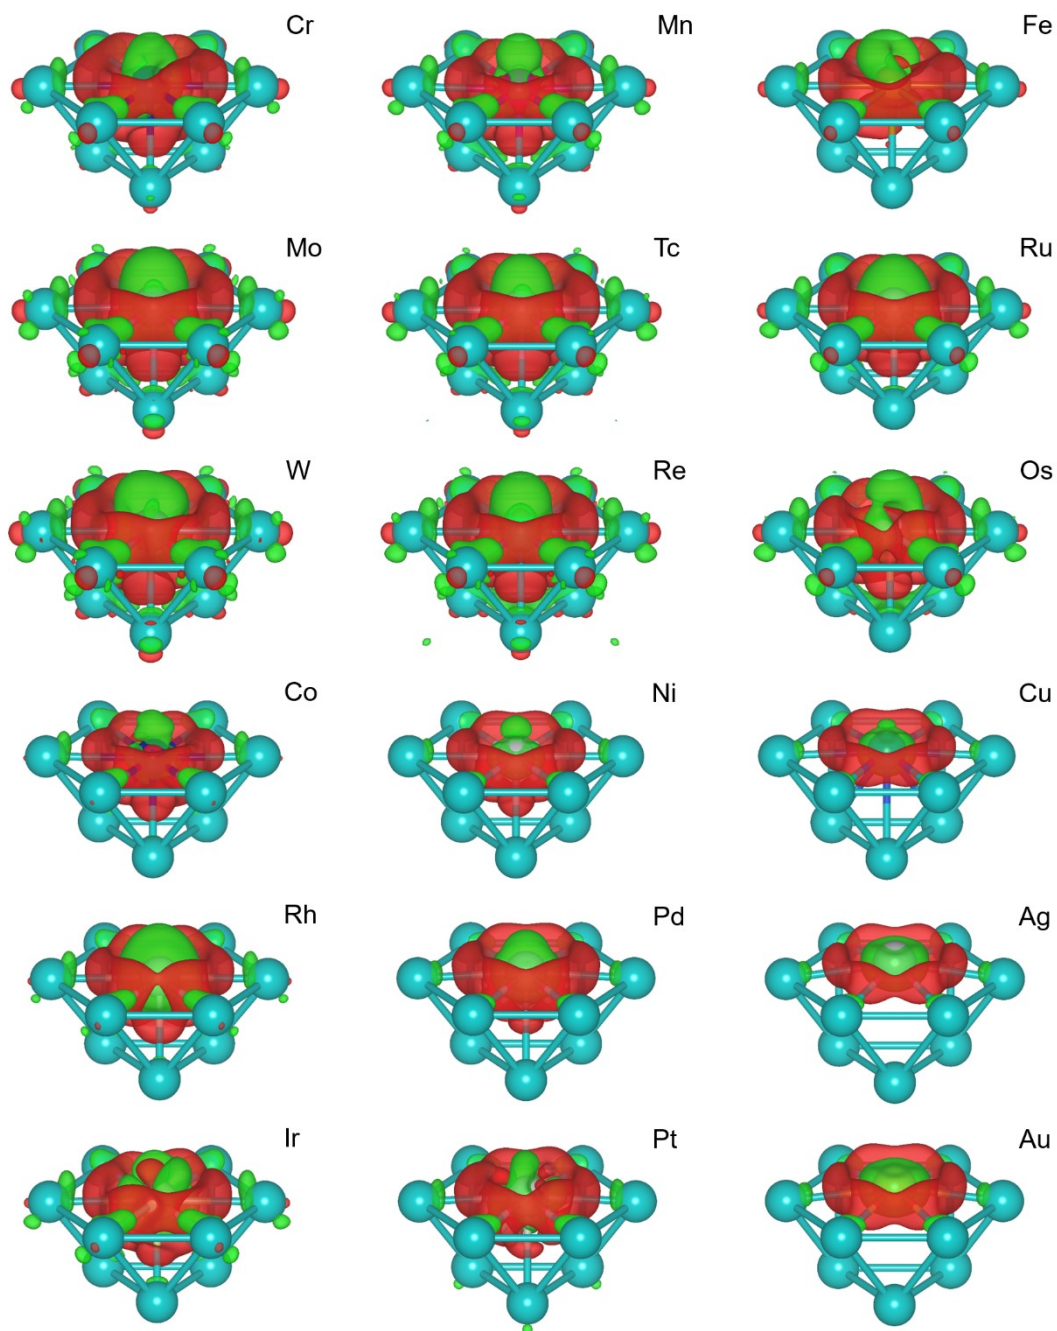

**Figure S1.** The charge density difference of different TM atoms anchored to the defective Re(111). Red and green isosurfaces represent charge accumulation and depletion in the space. The isosurface value was set to be  $0.005 e \cdot \text{\AA}^{-3}$ .



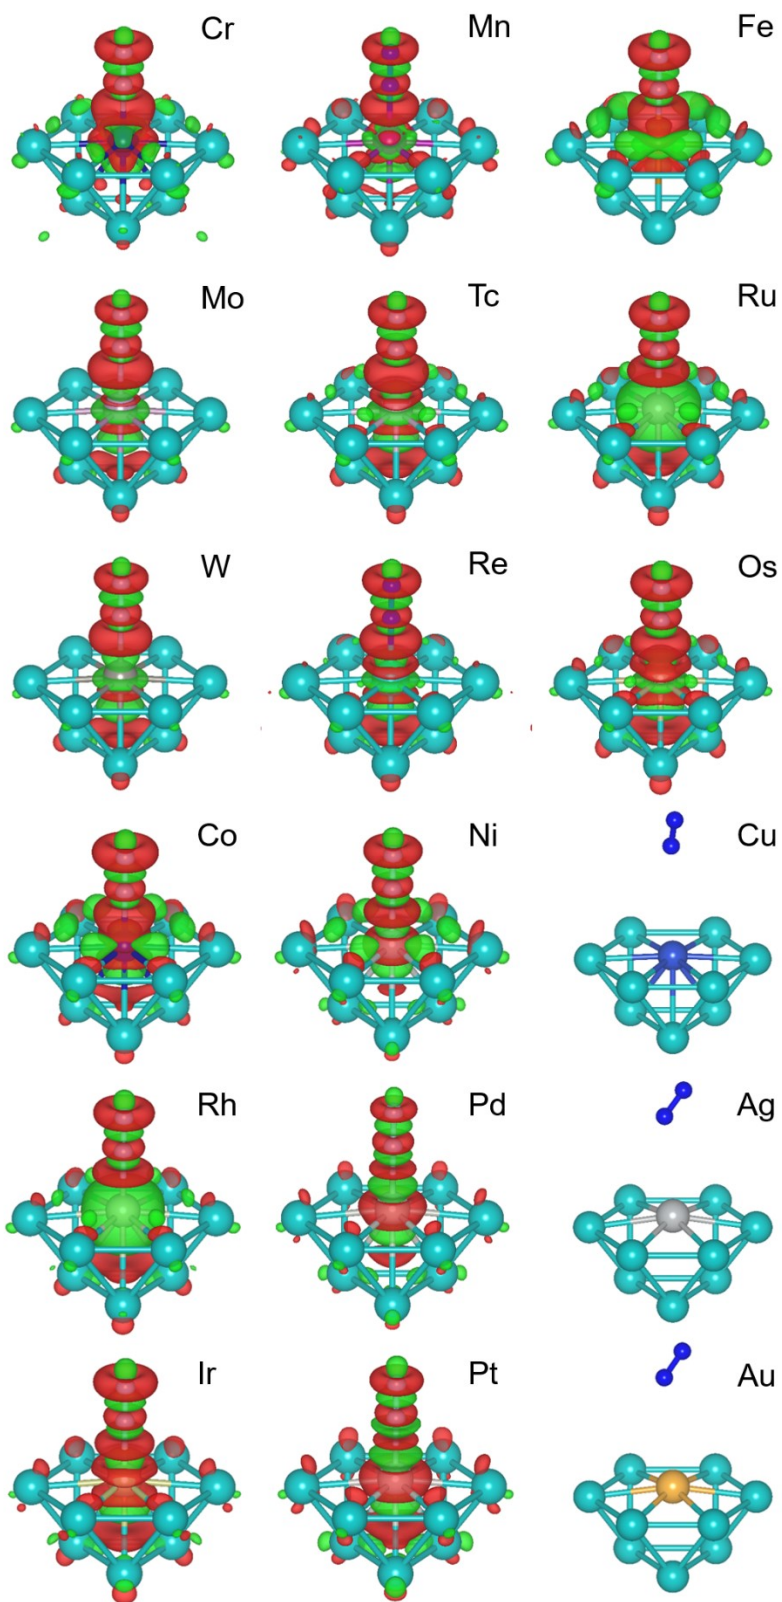

**Figure S2.** The charge density difference of  $N_2$  adsorbed to the 18 catalysts in the end-on configuration. Red and green isosurfaces represent charge accumulation and depletion in the space. The isosurface value was set to be  $0.0015 e \cdot \text{\AA}^{-3}$ .

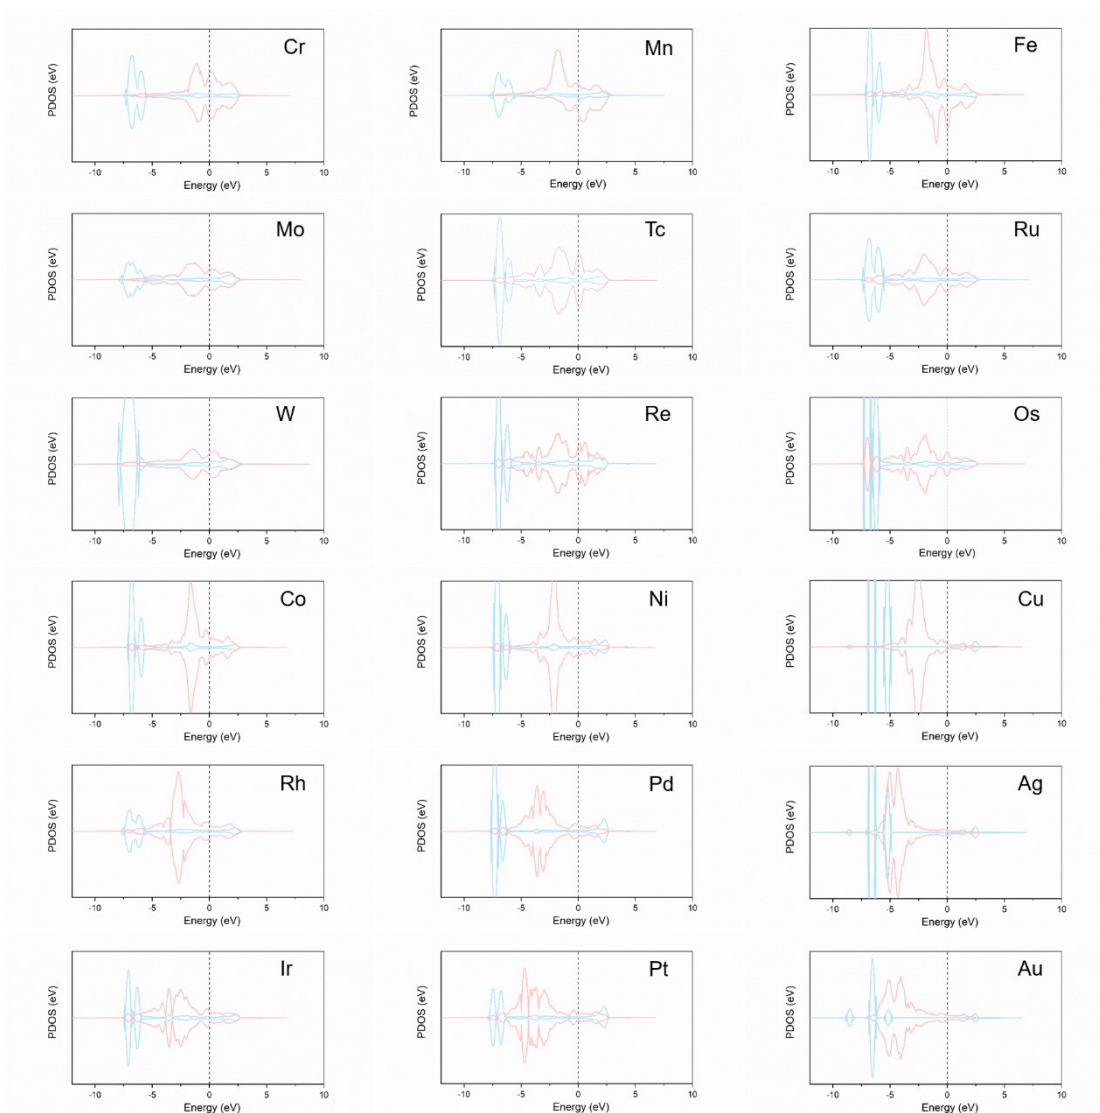

**Figure S3.** The partial density of states (PDOS) of various TM atom (d orbital) and N<sub>2</sub> molecule.

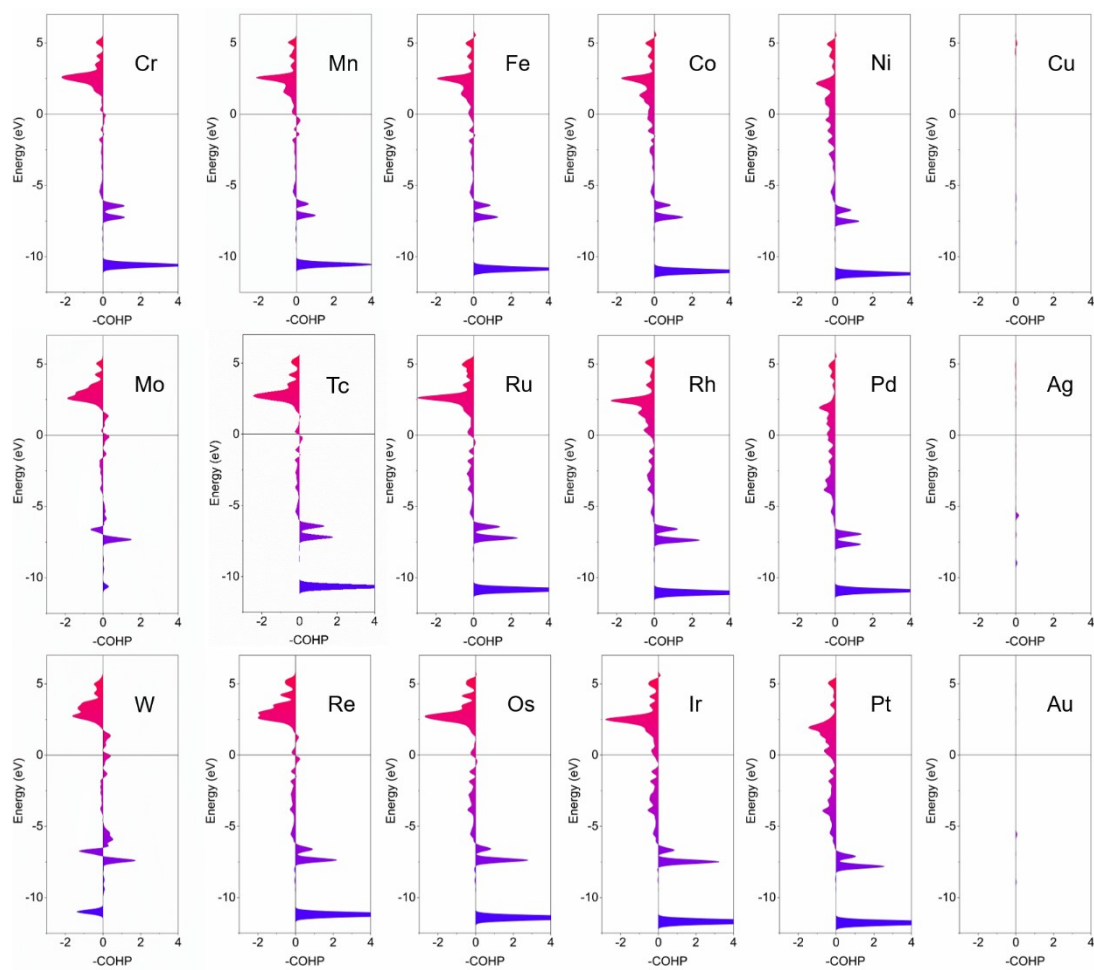

**Figure S4.** The projected crystal orbital Hamilton population (pCOHP) between TM-N on the SAA catalysts. The dashed lines indicate the Fermi level ( $E_F$ ).

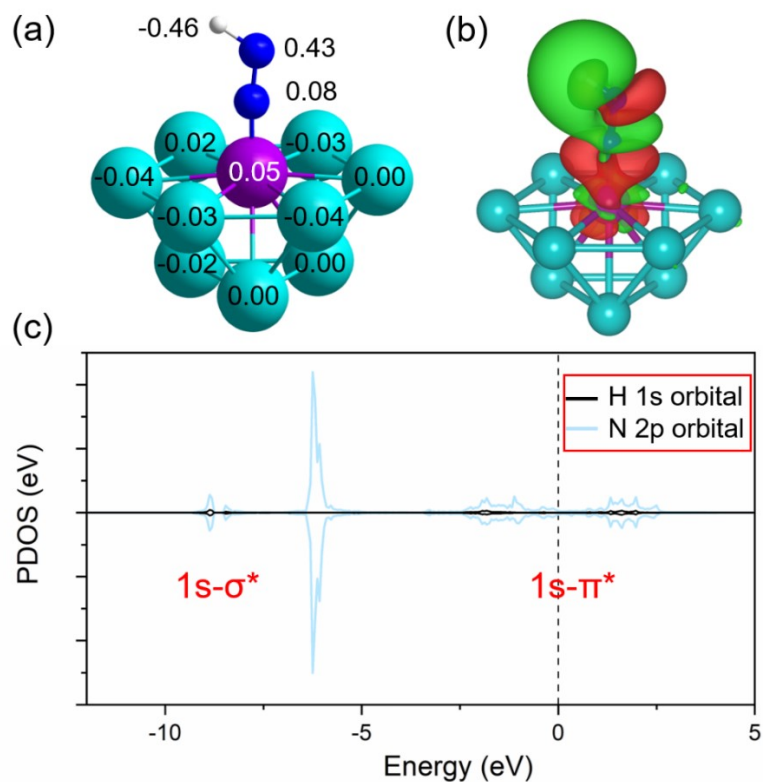

**Figure S5.** (a) Bader charge transfer in the \*NNH intermediate. (b) The charge density difference of H adsorbed to the \*N<sub>2</sub> intermediate. Red and green isosurfaces represent charge accumulation and depletion in the space. The isosurface value was set to be 0.0015 e·Å<sup>-3</sup>. (c) The partial density of states (PDOS) of the H atom (1s orbital) and N atoms (2p orbital) in the \*NNH intermediate.
